# Supplementary material
Source: PubMed Central journal article supplement (PMC10118848)
Supplement: NIHMS1892223-supplement-Supporting_Information.pdf [file NIHMS1892223-supplement-Supporting_Information.pdf]

Supporting Information

**On-capillary cell lysis enables top-down proteomic analysis of single mammalian cells by CE-MS/MS**

*Kendall R. Johnson<sup>†</sup>, Yunfan Gao<sup>†</sup>, Michal Greguš, Alexander R. Ivanov\**

*Barnett Institute of Chemical and Biological Analysis, Department of Chemistry and Chemical Biology, Northeastern University, 360 Huntington Ave., Boston, Massachusetts 02115, United States*

\*Email: [a.ivanov@northeastern.edu](mailto:a.ivanov@northeastern.edu)

## Table of Contents

|    |                                                                                                                               |     |
|----|-------------------------------------------------------------------------------------------------------------------------------|-----|
| 1. | Experimental .....                                                                                                            | S3  |
| 2. | Figure S1. Representative ion density maps of HeLa cell TDP .....                                                             | S4  |
| 3. | Figure S2. Measuring single HeLa cell diameters from microscope images .....                                                  | S5  |
| 4. | Figure S3. Match-between-runs after migration time alignment.....                                                             | S6  |
| 5. | Figure S4. THP-1 single cell protein and proteoform identifications with and without match-between-runs .....                 | S7  |
| 6. | Table S1. Protein and proteoform identification numbers with two-level filtering (1% FDR and additional e-value cutoff) ..... | S8  |
| 7. | Table S2. TopFD Search Parameters .....                                                                                       | S9  |
| 8. | Table S3. TopPIC Search Parameters .....                                                                                      | S10 |
| 9. | References .....                                                                                                              | S11 |

# 1. Experimental

## Materials and Reagents

Optima LC-MS grade water was purchased from Fisher Scientific (Pittsburgh, PA). Ammonium acetate, acetic acid (HAc), sodium hydroxide (NaOH), methanol (MeOH), HPLC-MS grade formic acid (FA), and acridine orange were obtained from Sigma-Aldrich (St. Louis, MO). Aquapel was purchased from PGW Auto Glass (Cranberry Twp, PA). Premium fetal bovine serum (FBS) was obtained from R&D Systems (Minneapolis, MN). Gibco penicillin–streptomycin (P/S) was purchased from Thermo Fisher Scientific (Waltham, MA). F-12K Medium (Kaighn's Modification of Ham's F-12 Medium) was purchased from ATCC (Manassas, VA).

## Cell Culture

HeLa-S3 cells were converted to grow in suspension culture following a published protocol,<sup>1</sup> after which they were cultured in F-12K medium supplemented with 10% FBS, 100 I.U./mL penicillin, and 100 µg/mL streptomycin. The cell density was maintained between 4.0E5 and 1.5E6 cells/mL. THP-1 cells were cultured in RPMI 1640 medium supplemented with 10% FBS, 0.05 mM 2-mercaptoethanol, 100 I.U./mL penicillin, and 100 µg/mL streptomycin. The cell density of THP-1 cells was maintained between 2E5 and 1E5 cells/mL. Cell viability and density were determined by trypan blue staining and hemocytometer cell counting upon each cell passage.

## Additional mass spectrometry settings

The ion transfer tube was set to 110°C. For MS1 scan, the scan range was set to 600 to 2000 m/z with a maximum injection time of 100 ms and an AGC target setting of  $1 \times 10^6$ . The RF Lens was set to 50%. The top two intensity precursor ions were selected with an intensity threshold of  $2 \times 10^6$ . The dynamic exclusion window was set to 90 s, and only precursors with charge states 5-24 were selected for fragmentation. Precursor ions were isolated with a 3.0 m/z window and fragmented with an HCD collision energy of 23%. A 500 ms ion injection time and an AGC target of  $1 \times 10^6$  was used in MS2 scans.

## Additional details on data analysis

Gene ontology (GO) term enrichment analysis was performed in FunRich (v3.1.3)<sup>2</sup> using the UniProt human database (downloaded July 2022).

Open-source web tools ClustVis<sup>3</sup> and TBtools<sup>4</sup> were used for principal component analysis and unsupervised hierarchical heat map clustering, respectively. Further data analysis was performed in the R environment.<sup>5</sup> Graphical outputs were generated using the package ggplot2.<sup>6</sup>

## 2. Figure S1. Representative ion density maps of HeLa cell TDP

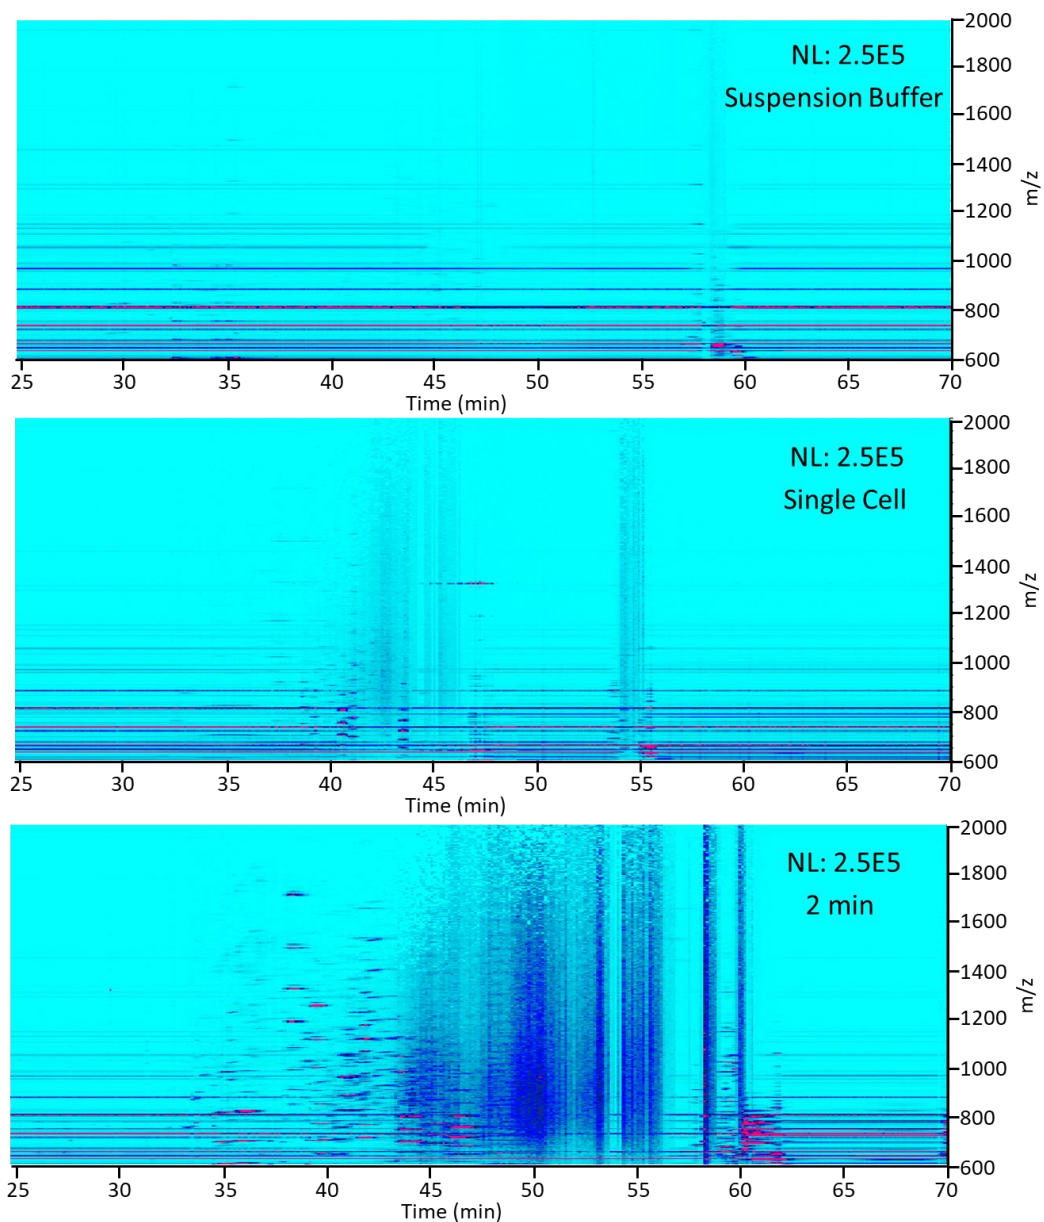

**Figure S1. Representative ion density maps of HeLa cell TDP.** Cell suspension buffer (top), a single HeLa cell (middle) and 2-min spray voltage injection of cells (bottom). Normalized to 2.5E5 intensity.

**3. Figure S2. Measuring single HeLa cell diameters from microscope images**

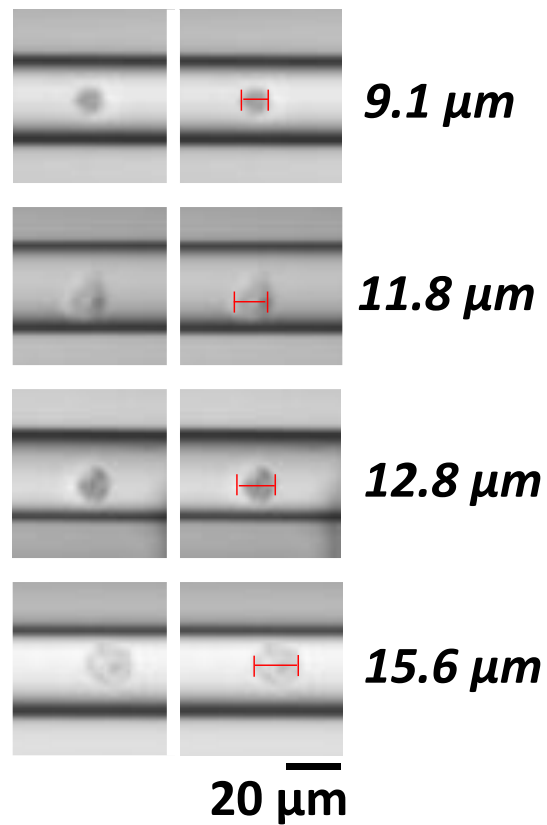

**Figure S2. Measuring single HeLa cell diameters from microscope images.** Zoomed in images of single HeLa cells inside the capillary prior to cell lysis and subsequent TDP analysis by CE-MS/MS. Red lines superimposed over the cells were used to calculate cell diameters.

#### 4. Figure S3. Match-between-runs after migration time alignment

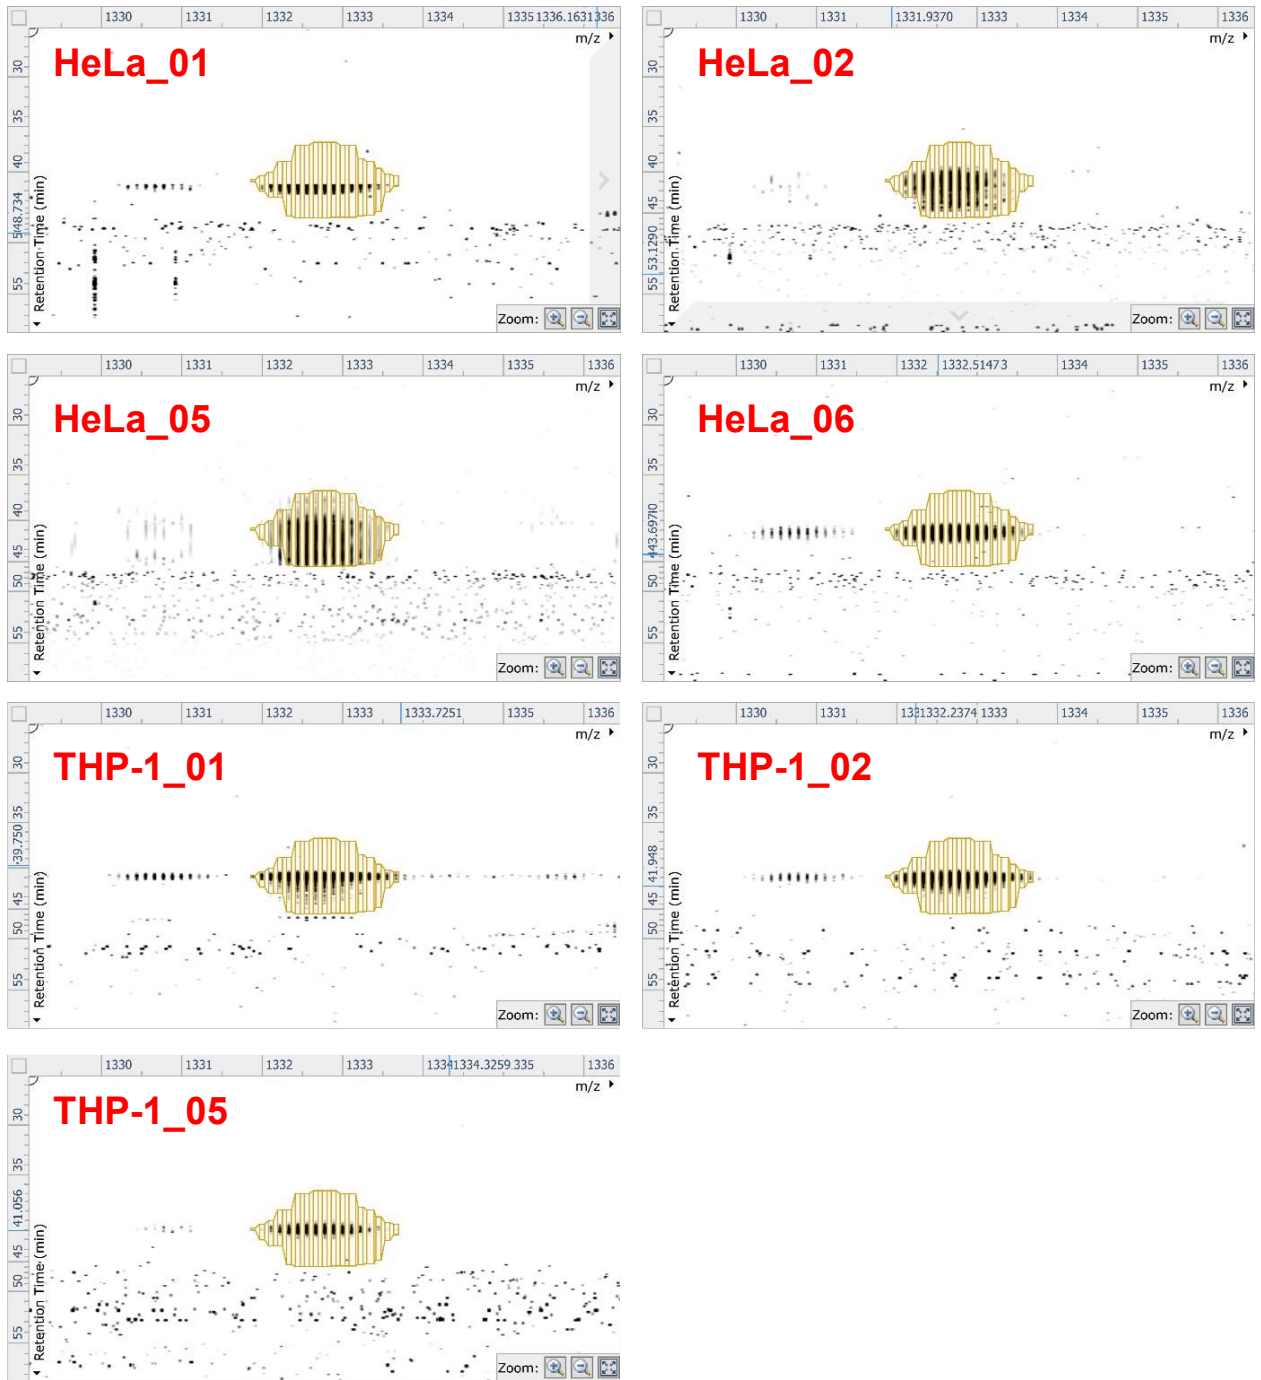

**Figure S3. Match-between-runs after migration time alignment.** Representative images of peak picking in each HeLa and THP-1 single-cell data file for MBR using Progenesis QI software. The proteoform shown here corresponds to a variant of prothymosin alpha isoform 2, with the initiator methionine removed and N-terminal acetylation.

5. Figure S4. THP-1 single cell protein and proteoform identifications with and without match-between-runs

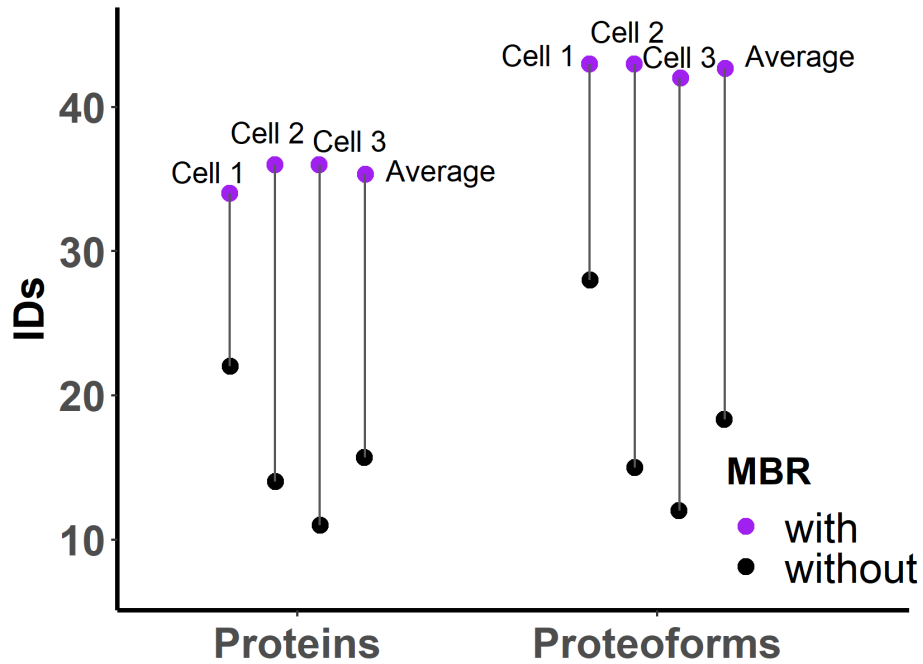

**Figure S4. THP-1 single cell protein and proteoform identifications with and without match-between-runs.** Protein and proteoform identifications for each THP-1 single cell replicate shown with and without match-between-runs. Average number of identifications with and without match-between-runs is also shown. The improvements in identifications of proteins and proteoforms observed for THP-1 cells are similar to the gains reported in Figure 6A for HeLa cells using the same match-between-runs approach.

**6. Table S1. Protein and proteoform identification numbers with two-level filtering (1% FDR and additional e-value cutoff)**

| Sample ID           | Protein     |                                | Proteoform  |                                |
|---------------------|-------------|--------------------------------|-------------|--------------------------------|
|                     | 1% FDR only | 1% FDR and e-value $\leq$ 0.01 | 1% FDR only | 1% FDR and e-value $\leq$ 0.01 |
| blank1              | 1           | 0                              | 1           | 0                              |
| blank2              | 2           | 0                              | 2           | 0                              |
| blank3              | 0           | 0                              | 0           | 0                              |
| blank4              | 0           | 0                              | 0           | 0                              |
| suspension_buffer_1 | 2           | 2                              | 4           | 4                              |
| suspension_buffer_2 | 3           | 2                              | 5           | 4                              |
| suspension_buffer_3 | 4           | 2                              | 5           | 4                              |
| suspension_buffer_4 | 2           | 2                              | 2           | 2                              |
| 2min_sprayvoltage_1 | 36          | 33                             | 46          | 40                             |
| 2min_sprayvoltage_2 | 61          | 54                             | 83          | 74                             |
| 2min_sprayvoltage_3 | 46          | 44                             | 74          | 69                             |
| 2min_sprayvoltage_4 | 62          | 57                             | 93          | 88                             |
| 1min_sprayvoltage_1 | 15          | 17                             | 21          | 25                             |
| 1min_sprayvoltage_2 | 36          | 32                             | 54          | 49                             |
| 1min_sprayvoltage_3 | 38          | 33                             | 55          | 50                             |
| 1min_sprayvoltage_4 | 28          | 24                             | 43          | 40                             |
| 1cell_HeLa_1        | 18          | 17                             | 24          | 24                             |
| 1cell_HeLa_2        | 22          | 21                             | 25          | 24                             |
| 1cell_HeLa_3        | 44          | 40                             | 56          | 50                             |
| 1cell_HeLa_4        | 26          | 25                             | 36          | 33                             |
| 1cell_THP1_1        | 22          | 22                             | 30          | 28                             |
| 1cell_THP1_2        | 15          | 14                             | 17          | 15                             |
| 1cell_THP1_3        | 12          | 11                             | 13          | 12                             |



## 7. Table S2. TopFD Search Parameters

|                                    |               |
|------------------------------------|---------------|
| <b>Max. charge</b>                 | <b>30</b>     |
| <b>Max. mass (Da)</b>              | <b>100000</b> |
| <b>MS1 S/N ratio</b>               | <b>3.0</b>    |
| <b>MS2 S/N ratio</b>               | <b>1.0</b>    |
| <b>Precursor window size (m/z)</b> | <b>3.0</b>    |
| <b>M/z error (m/z)</b>             | <b>0.02</b>   |

## 8. Table S3. TopPIC Search Parameters

|                                          |                                                              |
|------------------------------------------|--------------------------------------------------------------|
| <b>Decoy Database</b>                    | <b>Checked</b>                                               |
| <b>Spectrum level FDR</b>                | <b>0.01</b>                                                  |
| <b>Proteoform level FDR</b>              | <b>0.01</b>                                                  |
| <b>Mass error tolerance (ppm)</b>        | <b>15</b>                                                    |
| <b>PrSM cluster error tolerance (Da)</b> | <b>1.2</b>                                                   |
| <b>Maximum number of mass shifts</b>     | <b>1</b>                                                     |
| <b>N-terminal forms</b>                  | <b>None,<br/>NME,<br/>NME_Acetylation,<br/>M_acetylation</b> |
| <b>Maximum mass shift (Da)</b>           | <b>500</b>                                                   |
| <b>Minimum mass shift (Da)</b>           | <b>-500</b>                                                  |
| <b>Number of combined spectra</b>        | <b>1</b>                                                     |

\* NME: N-terminal methionine excision, NME\_Acetylation: N-terminal methionine excision and acetylation, M\_acetylation: N-terminal methionine acetylation.

## 9. References

1. Abdeen, S. H.; Abdeen, A. M.; El-Enshasy, H. A.; Shereef, A. A., HeLa-S3 Cell Growth Conditions in Serum-Free Medium and Adaptability for Proliferation in Suspension Culture. *J Biol Sci* **2011**, *11* (2), 124-134.
2. Pathan, M.; Keerthikumar, S.; Ang, C. S.; Gangoda, L.; Quek, C. Y.; Williamson, N. A.; Mouradov, D.; Sieber, O. M.; Simpson, R. J.; Salim, A.; Bacic, A.; Hill, A. F.; Stroud, D. A.; Ryan, M. T.; Agbinya, J. I.; Mariadason, J. M.; Burgess, A. W.; Mathivanan, S., FunRich: An open access standalone functional enrichment and interaction network analysis tool. *Proteomics* **2015**, *15* (15), 2597-601.
3. Metsalu, T.; Vilo, J., ClustVis: a web tool for visualizing clustering of multivariate data using Principal Component Analysis and heatmap. *Nucleic Acids Res* **2015**, *43* (W1), W566-70.
4. Chen, C.; Chen, H.; Zhang, Y.; Thomas, H. R.; Frank, M. H.; He, Y.; Xia, R., TBtools: An Integrative Toolkit Developed for Interactive Analyses of Big Biological Data. *Mol Plant* **2020**, *13* (8), 1194-1202.
5. R Core Team *R: A language and environment for statistical computing*, R Foundation for Statistical Computing: Vienna, Austria, 2019.
6. Hadley, W., *Ggplot2 : elegant graphics for data analysis*. Second edition. ed.; Springer-Verlag New York: 2016; p 1 online resource.
